# Supplementary material for: Rapid microRNA detection using power-free microfluidic chip: coaxial stacking effect enhances the sandwich hybridization
Source: Royal Society of Chemistry journal article supplement (doi:10.1039/c2an16154k), 2012-01-01
Supplement: c2an16154k.pdf [file c2an16154k.pdf]

## Electronic supplementary information (ESI)

### MicroRNA Detection in Twenty Minutes Using Power-Free Microfluidic Chip: Coaxial Stacking Effect Enhances the Sandwich Hybridization

Hideyuki Arata, Hiroshi Komatsu, Aishan Han, Kazuo Hosokawa and Mizuo Maeda

#### 1. Calculation of the melting temperatures ( $T_m$ ) concerning miR-21

We used the HyTher program provided on the website by Prof. SantaLucia, Jr.'s lab at Wayne State University.

<http://ozone3.chem.wayne.edu/cgi-bin/login/login/loginVerify.cgi>.

#### Chemical conditions

Monovalent cation : 0.825 M (Na<sup>+</sup> contained in 5×SSC)

Top strand (miR-21): 1 nM

Bottom strand (probe DNAs): 1 μM

#### Sequences (5' to 3')

Sandwich hybridization and full duplex

|               | Sandwich hybridization                                   | MiR-21Flu/ Pro21full          |
|---------------|----------------------------------------------------------|-------------------------------|
| Top strand    | uag cuu auc aga cug aug uug a                            | uag cuu auc aga cug aug uug a |
| Bottom strand | tca aca tca gt s ctg ata agc ta<br>(s: coaxial stacking) | tca aca tca gtc tga taa gct a |
| $T_m$         | 73.4 °C                                                  | 70.7 °C                       |

Hybridization with individual probe DNAs

|               | MiR-21/ProFlu21 | MiR-21/ Pro21  |
|---------------|-----------------|----------------|
| Top strand    | uag cuu auc ag  | acu gau guu ga |
| Bottom strand | ctg ata agc ta  | tca aca tca gt |
| $T_m$         | 37.6 °C         | 42.0 °C        |

## 2. Experiment with a gap base between the two probes

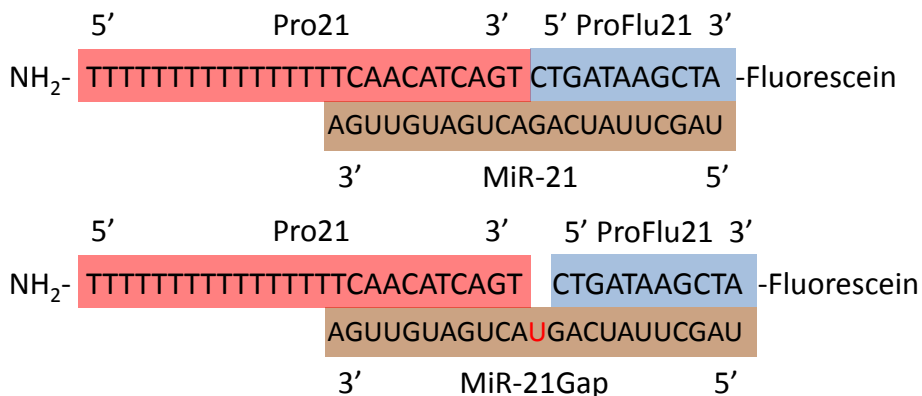

**Fig. S1** Construction and sequences of sandwich hybridization by natural miR-21 (top, the results are described in the main text.) and sandwich hybridization by an artificial variant of miR-21 with additional U base at the center of its original sequence (MiR-21Gap). The additional base induces a single base gap between the two probe DNAs (bottom).

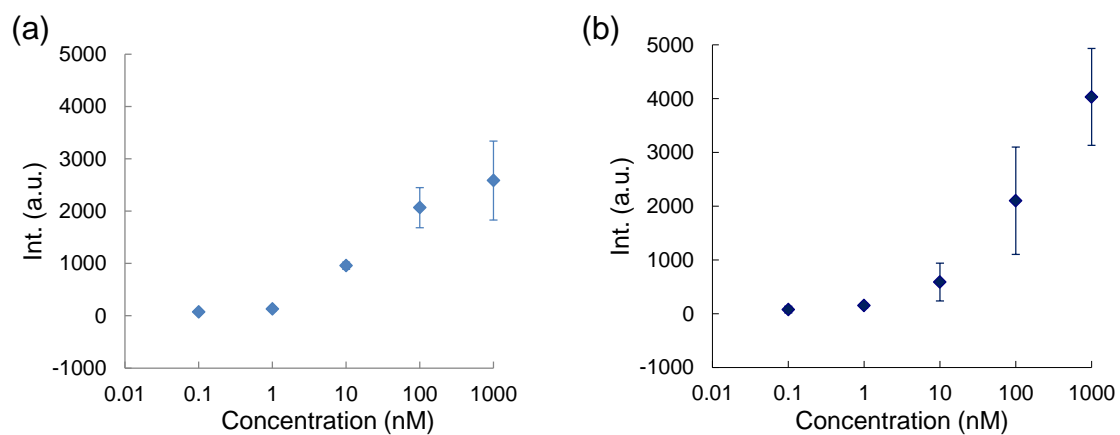

**Fig. S2** Detection of miR-21Gap. Fluorescent intensity vs. miRNA concentration by (a) protocol 1 and (b) protocol 2, which are the same data as in the main text.
